# Supplementary material for: Spatial and Temporal Virus Load Dynamics of SARS-CoV-2: A Single-Center Cohort Study
Source: PubMed Central journal article supplement (PMC7999170; doi:10.3390/diagnostics11030427), 2021-03-03
Supplement: diagnostics-11-00427-s001.pdf [file diagnostics-11-00427-s001.pdf]

**Table S1.** Patients' characteristics.

| <b>Number</b> | <b>Age (Years)</b> | <b>Sex</b> | <b>BMI (kg/m<sup>2</sup>)</b> | <b>Underlying Disease</b>                                                                      | <b>Immunosuppression</b> | <b>Intensive Care Unit Admission</b> | <b>Mechanical Ventilation</b> |
|---------------|--------------------|------------|-------------------------------|------------------------------------------------------------------------------------------------|--------------------------|--------------------------------------|-------------------------------|
| 1             | 85                 | M          | 28                            | Coronary heart disease, cardiac insufficiency, interstitial pneumopathy, sleep apnoea syndrome | No                       | Yes                                  | Yes                           |
| 2             | 69                 | M          | 25                            | Coronary heart disease, sleep apnoea syndrome                                                  | No                       | Yes                                  | Yes                           |
| 3             | 75                 | M          | 42                            | Arterial hypertension                                                                          | No                       | Yes                                  | Yes                           |
| 4             | 63                 | F          | 45                            | Asthma, sleep apnoea syndrome, type 2 diabetes                                                 | No                       | Yes                                  | Yes                           |
| 5             | 60                 | M          | 27                            | Arterial hypertension, coronary heart disease, sleep apnoea syndrome, type 2 diabetes          | No                       | Yes                                  | Yes                           |
| 6             | 56                 | M          | 37                            | Arterial hypertension                                                                          | No                       | Yes                                  | Yes                           |
| 7             | 40                 | M          | 33                            | Arterial hypertension                                                                          | No                       | Yes                                  | Yes                           |
| 8             | 66                 | F          | 26                            | None                                                                                           | No                       | Yes                                  | Yes                           |
| 9             | 71                 | M          | 25                            | Neurofibroma                                                                                   | No                       | Yes                                  | Yes                           |
